# Supplementary material
Source: publisher figshare collection journal article supplement (https://frontiersin.figshare.com/ndownloader/files/31262086)
Supplement: Supplementary file [file 31262086]

## Supplementary appendix 1

**Table e1. Maximum Injected Volumes, Dose per Muscle and Number of Injection sites in the Study Upper Limb**

| Muscle Group                                 | Injection Volume (mL) | Number of Injection Sites | Dose per Muscle in U/kg (Maximum U) |                         |                          |
|----------------------------------------------|-----------------------|---------------------------|-------------------------------------|-------------------------|--------------------------|
|                                              |                       |                           | Control Group                       | Treatment Groups        |                          |
|                                              |                       |                           | AboBoNT-A<br>2 U/kg                 | AboBoNT-A<br>8 U/kg [a] | AboBoNT-A<br>16 U/kg [a] |
| Elbow Flexors                                |                       |                           |                                     |                         |                          |
| Brachialis                                   | 0.6 [b]               | 2                         | 0.75 U/kg (30 U)                    | 3 U/kg (120 U)          | 6 U/kg (240 U)           |
| Brachioradialis                              | 0.3                   | 1                         | 0.375 U/kg (15 U)                   | 1.5 U/kg (60 U)         | 3 U/kg (120 U)           |
| Wrist Flexors                                |                       |                           |                                     |                         |                          |
| Flexor carpi radialis                        | 0.4                   | 1 to 2                    | 0.5 U/kg (20 U)                     | 2 U/kg (80 U)           | 4 U/kg (160 U)           |
| Flexor carpi ulnaris                         | 0.3                   | 1                         | 0.375 U/kg (15 U)                   | 1.5 U/kg (60 U)         | 3 U/kg (120 U)           |
| Additional Muscles                           |                       |                           |                                     |                         |                          |
| Biceps (optional muscle)                     | 0.6 [b]               | 2                         | 0.75 U/kg (30 U)                    | 3 U/kg (120 U)          | 6 U/kg (240 U)           |
| Pronator teres                               | 0.2                   | 1                         | 0.25 U/kg (10 U)                    | 1 U/kg (40 U)           | 2 U/kg (80 U)            |
| Pronator quadratus                           | 0.1                   | 1                         | 0.125 U/kg (5 U)                    | 0.5 U/kg (20 U)         | 1 U/kg (40 U)            |
| Flexor digitorum profundus                   | 0.2                   | 1                         | 0.25 U/kg (10 U)                    | 1 U/kg (40 U)           | 2 U/kg (80 U)            |
| Flexor digitorum superficialis               | 0.3                   | 2 to 4                    | 0.375 U/kg (15 U)                   | 1.5 U/kg (60 U)         | 3 U/kg (120 U)           |
| Flexor pollicis longus                       | 0.2                   | 1                         | 0.25 U/kg (10 U)                    | 1 U/kg (40 U)           | 2 U/kg (80 U)            |
| Flexor pollicis brevis/<br>opponens pollicis | 0.1                   | 1                         | 0.125 U/kg (5 U)                    | 0.5 U/kg (20 U)         | 1 U/kg (40 U)            |
| Adductor pollicis                            | 0.1                   | 1                         | 0.125 U/kg (5 U)                    | 0.5 U/kg (20 U)         | 1 U/kg (40 U)            |
| Pectoralis major                             | 0.5                   | 1 to 2                    | 0.625 U/kg (25 U)                   | 2.5 U/kg (100 U)        | 5 U/kg (200 U)           |
| Pectoralis minor                             | 0.5                   | 1 to 2                    | 0.625 U/kg (25 U)                   | 2.5 U/kg (100 U)        | 5 U/kg (200 U)           |
| Total dose for the study upper limb          | 1.6                   |                           | 2 U/kg (80 U)                       | 8 U/kg (320 U)          | 16 U/kg (640 U)          |

U=units

a The total dose for the study limb could not exceed 320 U in the 8 U/kg group and 640 U in the 16 U/kg group.

b Dose was administered across the two injection sites.
